# Supplementary figures and images for: Unraveling three-dimensional chromatin structural dynamics during spermatogonial differentiation
Source: PubMed Central journal article supplement — J Biol Chem. 2022 Jan 1;298(2):101559. doi: 10.1016/j.jbc.2021.101559 (PMC8814405; doi:10.1016/j.jbc.2021.101559), 2022-01-01

A

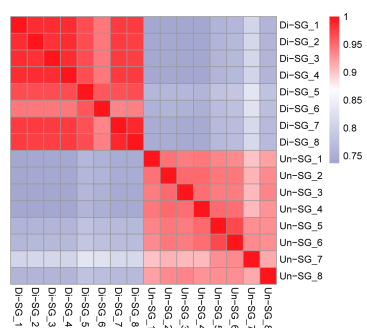

B

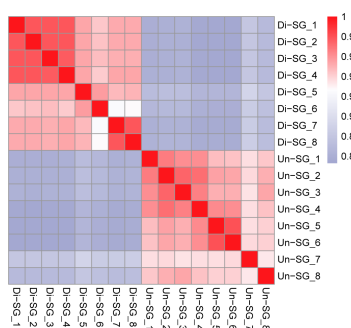

C

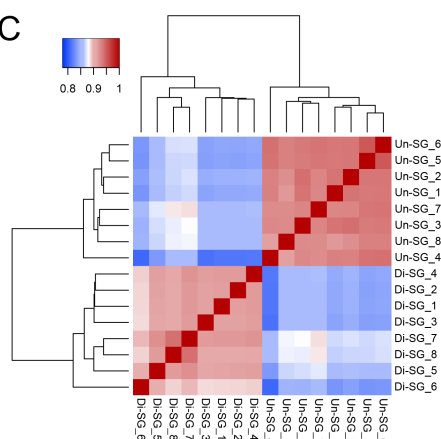

D

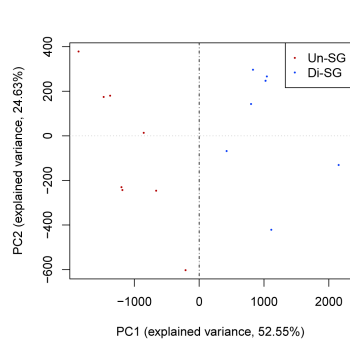

Supplement: mmc11.pdf [file mmc11.pdf]

**A** Compartment changes between Un-SG and Di-SG

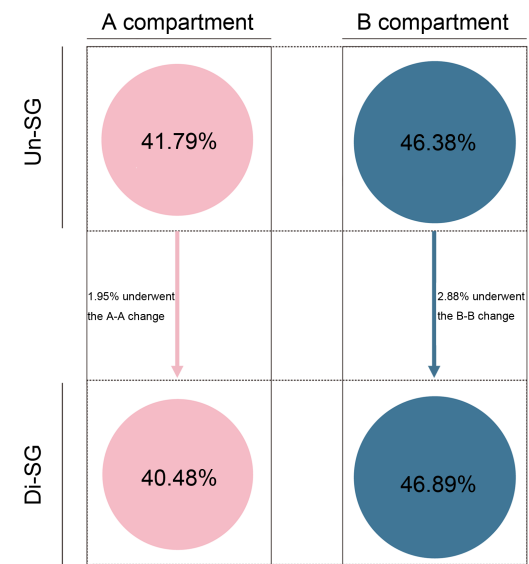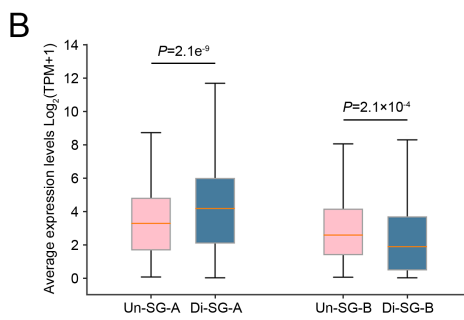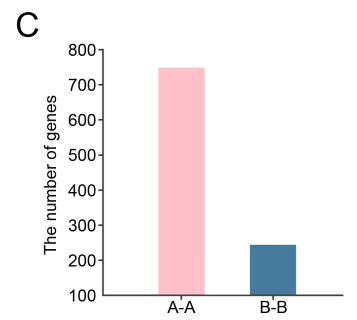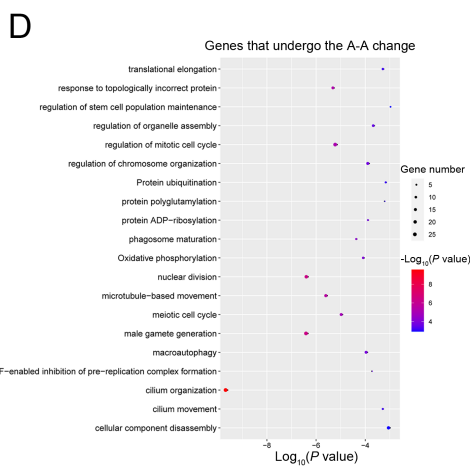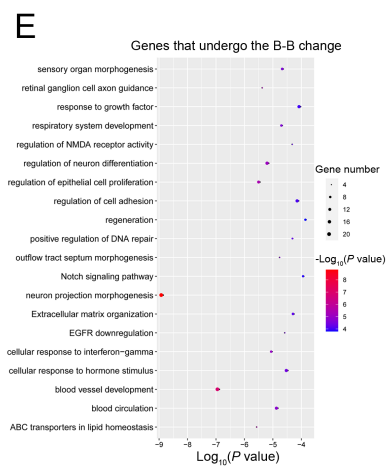

Supplement: mmc12.pdf [file mmc12.pdf]

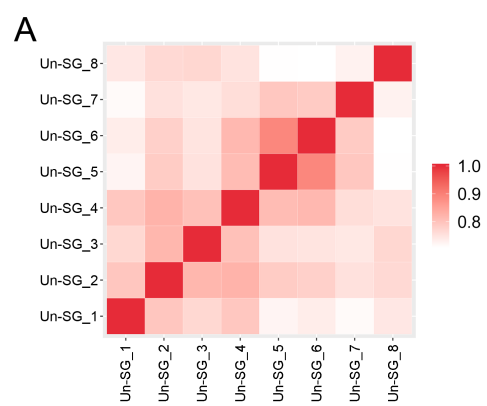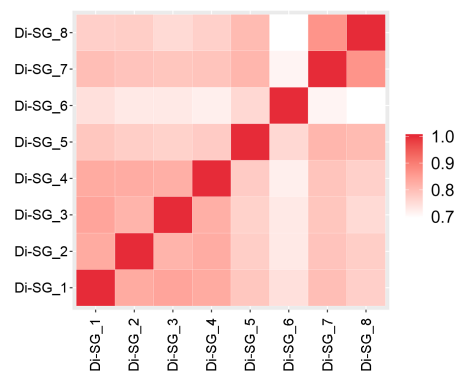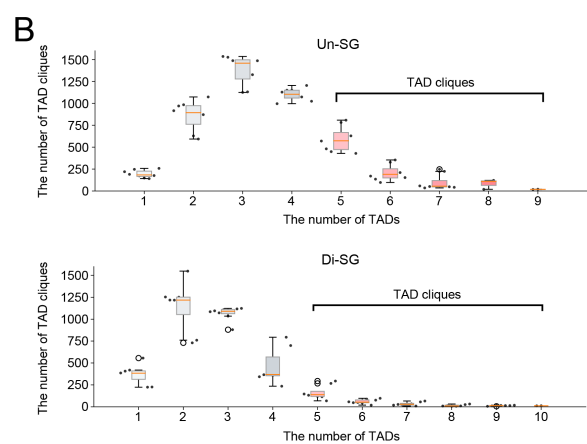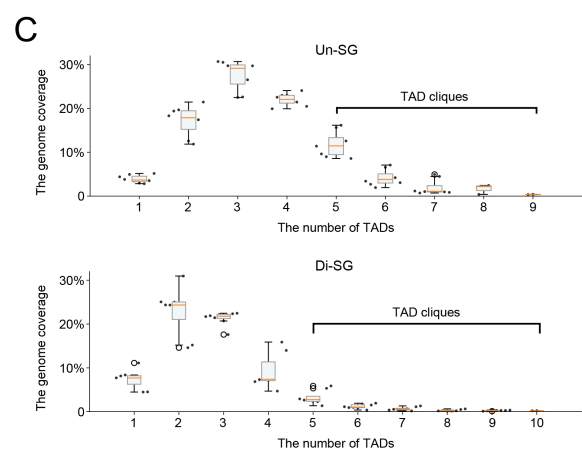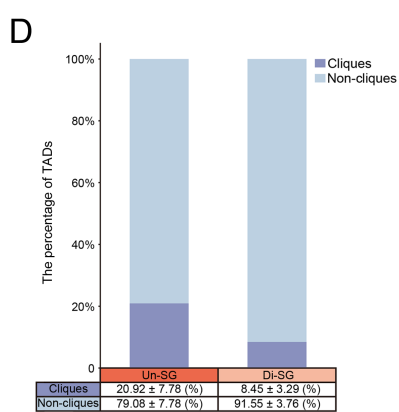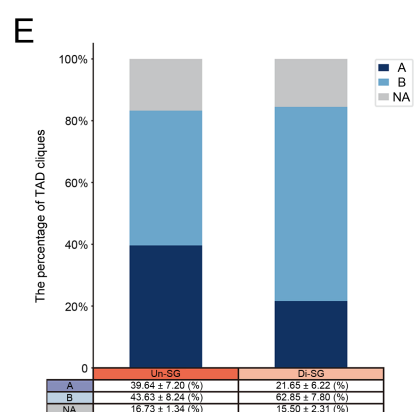

Supplement: mmc13.pdf [file mmc13.pdf]

A

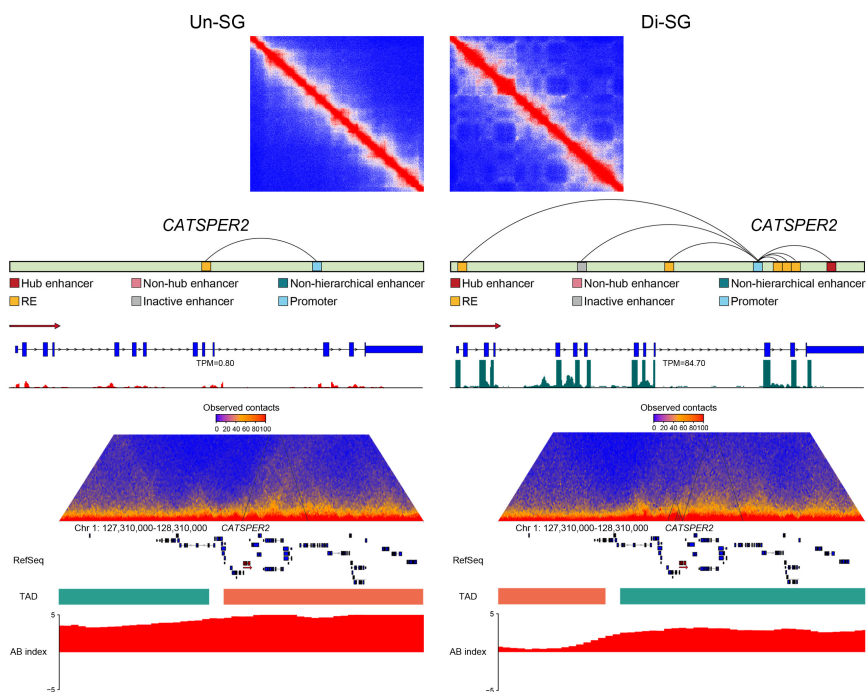

B

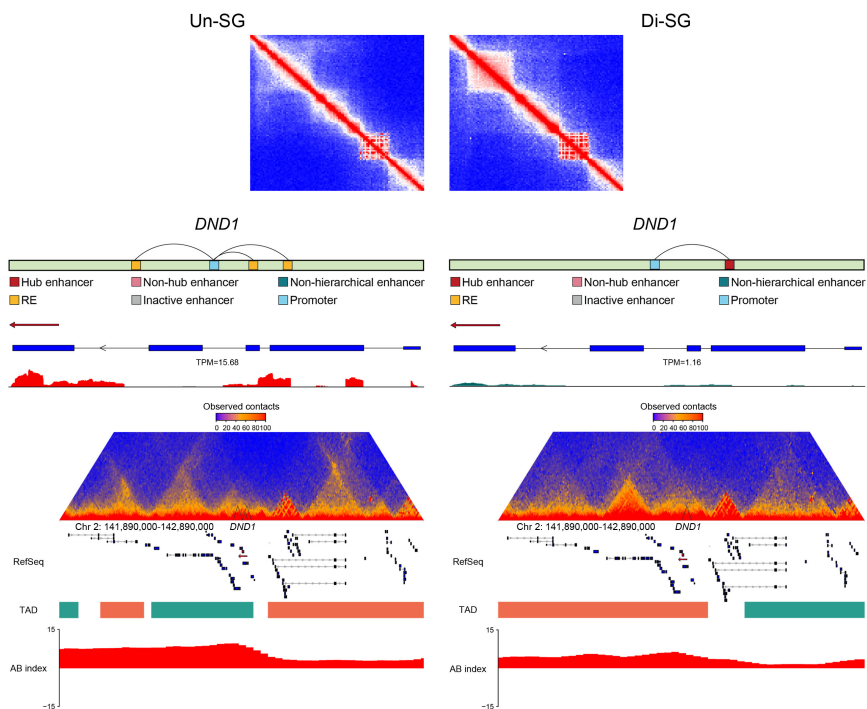

C

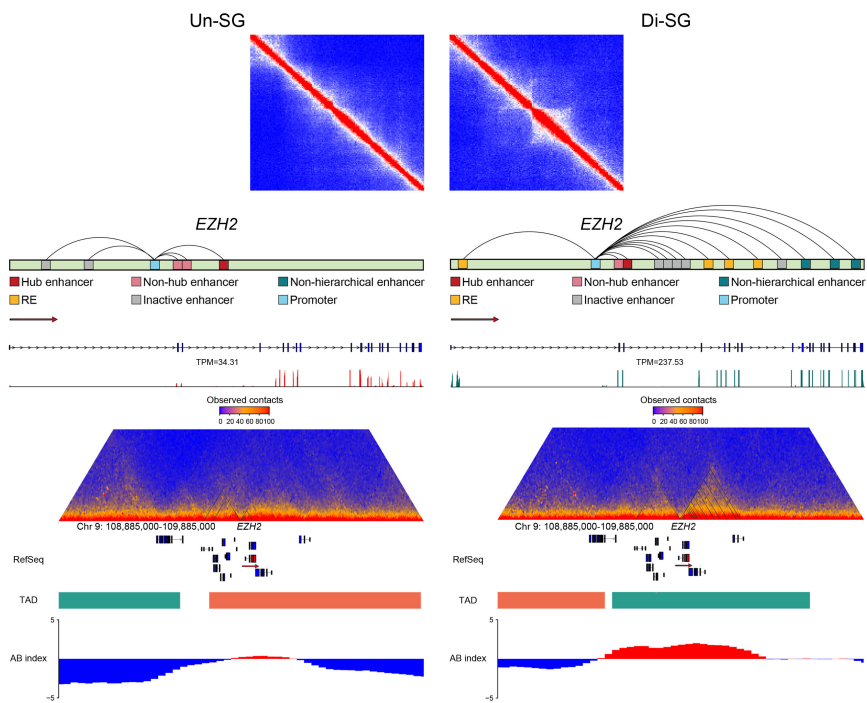

Supplement: mmc14.pdf [file mmc14.pdf]
